# Supplementary material
Source: PubMed Central journal article supplement (PMC11028116)
Supplement: 262_2017_2097_MOESM1_ESM.pdf [file 262_2017_2097_MOESM1_ESM.pdf]

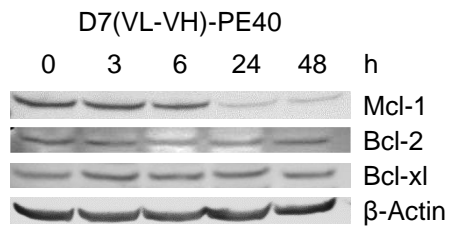

**Supplementary Figure 1** Influence of the immunotoxin D7(VL-VH)-PE40 on the expression of anti-apoptotic proteins of the Bcl-2 family in LNCaP prostate cancer cells. Cells were incubated with the immunotoxin and lysed. Proteins were detected by Western Blot.  $\beta$ -Actin was used as loading control.
